# Supplementary material for: Enhanced Electromagnetic Interference Shielding Properties of Immiscible Polyblends with Selective Localization of Reduced Graphene Oxide Networks
Source: MDPI journal article supplement (doi:10.3390/polym14050967), 2022-02-28
Supplement: s1 [file s1]

## Supplementary Materials

### Enhanced Electromagnetic Interference Shielding Properties of Immiscible Polyblends with Selective localization of Reduced Graphene Oxide Networks

Yiming Meng <sup>a,b</sup>, Sushant Sharma <sup>a</sup>, Jin Suk Chung <sup>a,\*</sup>, Wenjun Gan <sup>b,\*</sup>, Seung Hyun

Hur <sup>a</sup> and Won Mook Choi <sup>a</sup>

<sup>a</sup>*School of Chemical Engineering, University of Ulsan, Daehakro 93, Namgu, Ulsan 44610, Republic of Korea; 15026557980@163.com (Y.M.); sushant.nplindia@gmail.com (S.S.); shhur@mail.ulsan.ac.kr (S.H.H.); wmchoi98@ulsan.ac.kr (W.M.C.)*

<sup>b</sup>*Department of Macromolecular Materials and Engineering, College of Chemistry and Chemical Engineering, Shanghai University of Engineering Science, Longteng Road 333, 201620, Shanghai, P.R. China*

*\*Correspondence: jschung@mail.ulsan.ac.kr (J.S.C.); wjgan@sues.edu.cn (W.G.); Tel: +82-052-259-2249*

**Table S1.** Formulation of samples.

| Samples  | DGEBA (phr) <sup>1</sup> | PEI (phr) <sup>1</sup> | RGO (phr) <sup>1</sup> | C–A solution |
|----------|--------------------------|------------------------|------------------------|--------------|
| DGEBA    | 100                      | 0                      | 0                      | 80           |
| DR1      | 100                      | 0                      | x/ (100+0+x) =1.0%     | 80           |
| DR1.5    | 100                      | 0                      | x/ (100+0+x) =1.5%     | 80           |
| DR2      | 100                      | 0                      | x/ (100+0+x) =2.0%     | 80           |
| DR2.5    | 100                      | 0                      | x/ (100+0+x) =2.5%     | 80           |
| DR3      | 100                      | 0                      | x/ (100+0+x) =3.0%     | 80           |
| DP25     | 100                      | 25                     | 0                      | 80           |
| DP30     | 100                      | 30                     | 0                      | 80           |
| DP5R3    | 100                      | 5                      | x/ (100+5+x) =3.0%     | 80           |
| DP25R1   | 100                      | 25                     | x/ (100+25+x) =1.0%    | 80           |
| DP25R1.5 | 100                      | 25                     | x/ (100+25+x) =1.5%    | 80           |
| DP25R2   | 100                      | 25                     | x/ (100+25+x) =2.0%    | 80           |
| DP25R2.5 | 100                      | 25                     | x/ (100+25+x) =2.5%    | 80           |
| DP25R3   | 100                      | 25                     | x/ (100+25+x) =3.0%    | 80           |
| DP30R1   | 100                      | 30                     | x/ (100+30+x) =1.0%    | 80           |
| DP30R1.5 | 100                      | 30                     | x/ (100+30+x) =1.5%    | 80           |

|          |     |    |                            |    |
|----------|-----|----|----------------------------|----|
| DP30R2   | 100 | 30 | $x / (100+30+x) = 2.0\%$   | 80 |
| DP30R2.5 | 100 | 30 | $x / (100+30+x) = 2.5\%$   | 80 |
| DP30R3   | 100 | 30 | $x / (100 + 30+x) = 3.0\%$ | 80 |

<sup>1</sup>phr: parts per hundred in the DGEBA, x: RGO (phr), C-A solution: a solution of Me-THPA and DMBA.

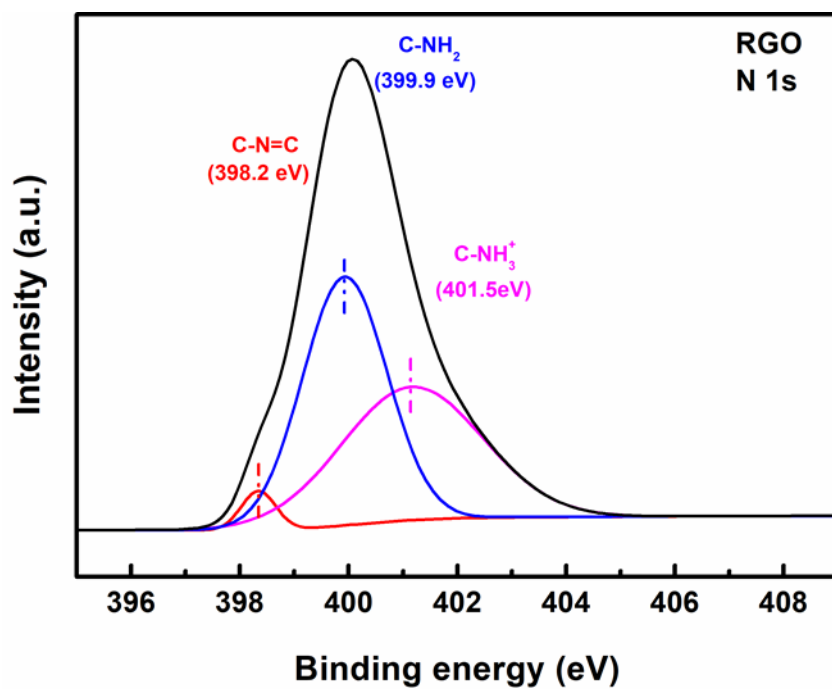

**Figure S1.** XPS spectra of RGO flakes of N 1 s high-resolution core-level.

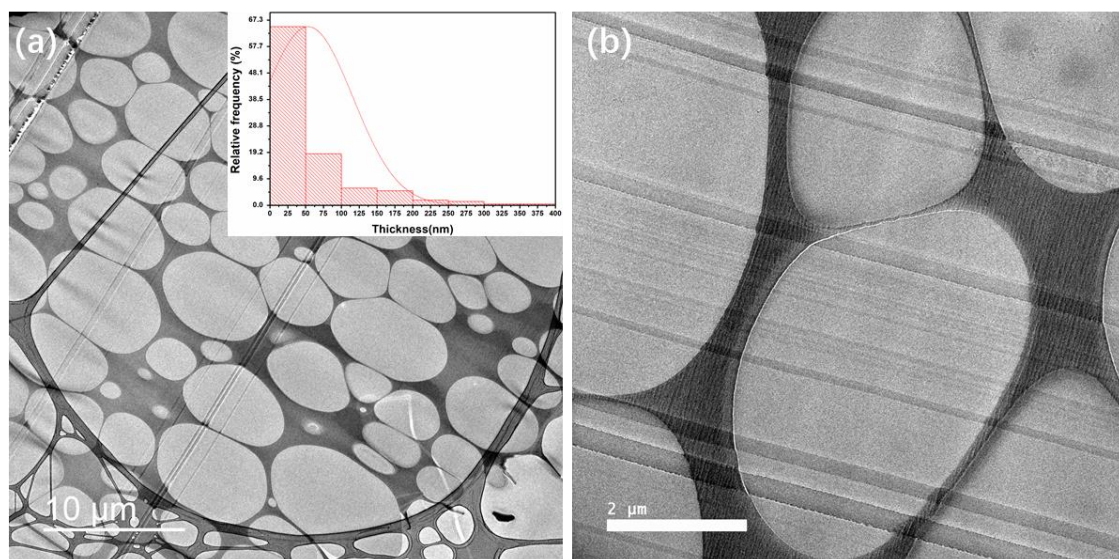

**Figure S2.** FETEM images of (a) DP30 in low magnification and the histogram of the relative frequency versus the PEI thickness exhibiting the PEI thickness distribution in

the figure (inset), (b) DP30 in high magnification in which the dark domains are PEI-rich phases and the bright domains are DGEBA-rich phases.

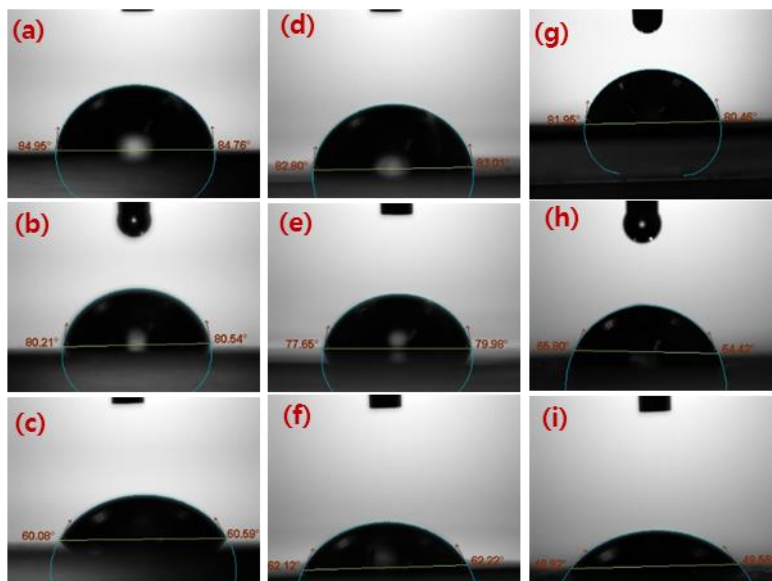

**Figure S3.** The contact angle images of samples: (a) DI on DGEBA, (b) DI on PEI, (c) DI on RGO, (d) GL on DGEBA, (e) GL on PEI, (f) GL on RGO, (g) FA on DGEBA, (h) FA on PEI, and (i) FA on RGO.

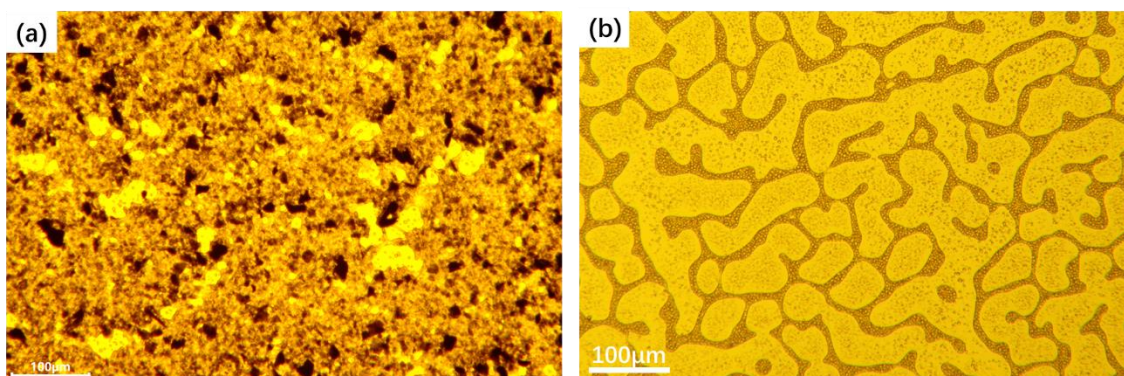

**Figure S4.** The OM micrographs of (a) DP25R3 and (b) DP25. The dark yellow domains represent the PEI-rich phase, bright yellow domains represent the DGEBA-rich phases, and black sheets represent RGO.

**Table S2.** The surface tension parameters (in mJ/m<sup>2</sup>) of test liquids and static contact angles for DGEBA, PEI, and RGO.

| Liquid               | $\gamma_L$<br>(mJ/m <sup>2</sup> ) | $\gamma_L^d$<br>(mJ/m <sup>2</sup> ) | $\gamma_L^p$<br>(mJ/m <sup>2</sup> ) | Contact angle ( $\theta$ ) |      |      |
|----------------------|------------------------------------|--------------------------------------|--------------------------------------|----------------------------|------|------|
|                      |                                    |                                      |                                      | DGEBA                      | PEI  | RGO  |
| Deionized water (DI) | 72.8                               | 21.8                                 | 51                                   | 84.9                       | 82.9 | 81.2 |

|                |      |      |    |      |      |      |
|----------------|------|------|----|------|------|------|
| Glycerol (GL)  | 64.0 | 34.0 | 30 | 80.4 | 78.8 | 65.1 |
| Formamide (FA) | 58.0 | 39.0 | 19 | 60.4 | 62.2 | 49.7 |

**Table S3.** The surface tension parameters (in mJ/m<sup>2</sup>) for the free surfaces of DGEBA, PEI, and RGO.

| Materials | $\gamma^*$ (mJ/m <sup>2</sup> ) | $\gamma^d$ (mJ/m <sup>2</sup> ) | $\gamma^p$ (mJ/m <sup>2</sup> ) |
|-----------|---------------------------------|---------------------------------|---------------------------------|
| DGEBA     | 44.23                           | 31.75                           | 12.48                           |
| PEI       | 32.24                           | 26.74                           | 5.50                            |
| RGO       | 38.93                           | 34.86                           | 4.07                            |

$$*\gamma = \gamma^d + \gamma^p$$

**Table S4.** Comparison of electrical properties of previously published filler ternary polyblend systems with those of the systems in the current work.

| Samples          | Polymer A | Polymer B | Filler Loading (wt. %) | Volume Resistivity ( $\Omega$ cm)       | Volume Conductivity (S/m) | Ref       |
|------------------|-----------|-----------|------------------------|-----------------------------------------|---------------------------|-----------|
| EP/PEI/GnPs      | DGEBA     | PEI       | 2                      | $5.7 \times 10^5$                       | —                         | [1]       |
| PUF@GF/Epoxy     | DGEBA     | PU foam   | 8.04 vol%              | —                                       | $10^{-9}$                 | [2]       |
| MWCNT+GNP/Epoxy  | DGEBA     | —         | 2+3                    | $3.1 \times 10^{-3}$                    | $3.1 \times 10^{-3}$      | [3]       |
| EP/35PEI/GnPs    | DGEBA     | PEI       | 2                      | $\approx 10^7$                          | $\approx 10^{-5}$         | [4]       |
| EP/PEI/CB        | DGEBA     | PEI       | 1                      | $\approx 10^3$                          | —                         | [5]       |
| DGEBA/PEI/MWCNTs | DGEBA     | PEI       | 2                      | $3.86 \times 10^6$                      | —                         | [6]       |
| DGEBA/PEI/AgNWs  | DGEBA     | PEI       | 3                      | $9.6 \times 10^5 \Omega$<br>(surface R) | —                         | [7]       |
| DGEBA/PEI/RGO    | DGEBA     | PEI       | 1                      | 2.68                                    | 37.31                     | This work |
|                  |           |           | 2                      | 0.82                                    | 121.21                    |           |
|                  |           |           | 3                      | 0.27                                    | 366.3                     |           |

GF: graphene fluoride, GnPs: graphene nanoplatelets, CB: carbon black, MWCNTs: multiwall carbon nanotubes.

**Table S5.** The TGA spectra of samples under N<sub>2</sub> atmosphere.

| Sample | Temperature range (°C) | Assignment                                                         | Residues at 800 °C (wt.%) | Specific RGO loading in the composite (wt.%) |
|--------|------------------------|--------------------------------------------------------------------|---------------------------|----------------------------------------------|
| GO     | <100                   | (~16.9 %) The loss of physisorbed water molecules                  | 19.9                      | —                                            |
|        | 145-285                | (~31.5 %) The decomposition of oxygen-containing functional groups |                           |                                              |
|        | 285-645                | (~15 %) The pyrolysis of less stable (CO, CO <sub>2</sub> )        |                           |                                              |
| RGO    | <145                   | (~2.2 %) The release of water molecules                            | 69.5                      | —                                            |
|        | 145-285                | (~9.3 %) The decomposition of oxygen-containing functional groups  |                           |                                              |

285-645 (~13.4 %) The pyrolysis of less stable (CO, CO<sub>2</sub>)

|            |         |                                                                   |      |      |
|------------|---------|-------------------------------------------------------------------|------|------|
| Neat DGEBA | 200-475 | (~90.6 %) The decomposition of DGEBA                              | 2.9  | —    |
|            | 475-675 | (~6.5%) The decomposition of few DGEBA                            |      |      |
| DR3        | 200-475 | (~90.6 %) The decomposition of DGEBA                              | 5.5  | 2.60 |
|            | 475-675 | (~3.9%) The decomposition of few DGEBA                            |      |      |
| DP5R3      | 200-475 | (~86.3 %) The decomposition of DGEBA and non-aromatic part of PEI | 8.3  | 2.63 |
|            | 475-675 | (~5.4 %) The decomposition of aromatic part of PEI                |      |      |
| DP25R3     | 200-475 | (~76.8 %) The decomposition of DGEBA and non-aromatic part of PEI | 11.0 | 2.83 |
|            | 475-675 | (~12.2 %) The decomposition of aromatic part of PEI               |      |      |
| DP30R3     | 200-475 | (~77.9 %) The decomposition of DGEBA and non-aromatic part of PEI | 10.1 | 2.80 |
|            | 475-675 | (~12 %) The decomposition of aromatic part of PEI                 |      |      |

**Table S6.** The glass transition temperature  $T_g$  (taken as the intersection of the extrapolation of baseline with the extrapolation of the inflexion) of samples.

| Materials | Glass transition temperature $T_g$ (°C) |
|-----------|-----------------------------------------|
| DR1       | 94.0                                    |
| DR1.5     | 95.1                                    |
| DR2       | 95.6                                    |
| DR2.5     | 96.7                                    |
| DR3       | 97.2                                    |
| DP30R1    | 95.7                                    |
| DP30R1.5  | 97.3                                    |
| DP30R2    | 103.6                                   |
| DP30R2.5  | 105.1                                   |
| DP30R3    | 110.9                                   |

**Table S7.** The storage modulus and  $T_g$  of various samples.

| Samples    | Glassy modulus<br>E' (MPa) | Rubbery modulus<br>(MPa) | Glass transition<br>temperature (°C) |          |
|------------|----------------------------|--------------------------|--------------------------------------|----------|
|            |                            |                          | $T_{g1}$                             | $T_{g2}$ |
| Neat DGEBA | 2532                       | 11                       | 116.1                                |          |
| DR3        | 2650                       | 12                       | 117.1                                |          |
| DP25       | 2666                       | 79                       | 125.6                                | 193.6    |
| DP25R3     | 2686                       | 37                       | 127.5                                | 190.1    |
| DP30       | 2687                       | 75                       | 121.1                                | 186.5    |

|        |      |     |       |       |
|--------|------|-----|-------|-------|
| DP30R3 | 2917 | 136 | 126.2 | 201.2 |
|--------|------|-----|-------|-------|

$T_g$  of neat PEI: 217°C

**Table S8.** Comparison of EMI shielding performance with other composites.

| Samples                                     | Filler content<br>(wt.%) | Thickness<br>(mm) | Frequency<br>(GHz) | EMI SE<br>(dB) | Ref       |
|---------------------------------------------|--------------------------|-------------------|--------------------|----------------|-----------|
| PS/EMA/VCB                                  | 10                       | 1                 | 8.2-12.4           | 20.1           | [8]       |
| Epoxy/RGO                                   | 15                       | 2                 | 8.2-12.4           | 21             | [9]       |
| Epoxy/MWCNT                                 | 3                        | 2.8               | 13-18              | 7.1            | [10]      |
| Epoxy/RGO/Fe <sub>3</sub> O <sub>4</sub>    | 8.97                     | 2                 | 8.2-12.4           | 13.5           | [11]      |
| PEI/graphene                                | 10                       | 2.3               | 8.2-12.4           | 13             | [12]      |
| PMMA/Fe <sub>3</sub> O <sub>4</sub> @MWCNTs | 7                        | 2.5               | 8-12               | 13.1           | [13]      |
| PEI/Graphene@Fe <sub>3</sub> O <sub>4</sub> | 10                       | 2.5               | 8-12               | 17             | [14]      |
| EP/GNPs/rGO                                 | 7.9                      | 3                 | 8.2-12.4           | ~25            | [15]      |
| epoxy/rGO/carbonyl iron                     | —                        | 3                 | 8.2-12.4           | ~20            | [16]      |
| DGEBA/PEI/RGO                               | 3                        | 2                 | 8.2-12.4           | 25.9           | This work |

## References

- Pan, Y.-L.; Ma, C.-G.; Wan, H.-M.; Tao, P.-Y.; Shi, Q.; Huang, D.-S.; Wang, J.-X. Effect of Graphene Nanoplates on Phase Structure and Electrical Properties of Epoxy/Polyetherimide Composite. **2016**.
- Mani, D.; Vu, M.C.; Jeong, T.-H.; Kim, J.-B.; Lim, C.-S.; Lim, J.-H.; Kim, K.-M.; Kim, S.-R. 3D structured graphene fluoride-based epoxy composites with high thermal conductivity and electrical insulation. *Composites Part A: Applied Science and Manufacturing* **2021**, 149, 106585.
- Rajan, J.S. Effective use of nano-carbons in controlling the electrical conductivity of epoxy composites. *Composites Science and Technology* **2021**, 202, 108554.
- Wan, H.-M.; Ma, C.-G.; Xi, D.-Y.; Pan, Y.-L.; Shi, Q.; Tao, P.-Y. Effect of Carbon-based Nanofillers on Electrical Properties of Epoxy/Polyetherimide Composites. In *ADVANCED MATERIAL SCIENCE AND ENGINEERING AMSE2016*; World Scientific: 2016; pp. 19-24.
- Ma, C.G.; Xi, D.Y.; Liu, M. Epoxy resin/polyetherimide/carbon black conductive polymer composites with a double percolation structure by reaction-induced phase separation. *Journal of Composite Materials* **2013**, 47, 1153-1160.
- Wang, X.; Li, W.; Zhang, Z.; Chen, K.; Gan, W. Selective localization of multi-walled carbon nanotubes in epoxy/polyetherimide system and properties of the conductive composites. *Journal of Applied Polymer Science* **2019**, 136, 47911.
- Liu, Y.; Yang, X.; Yue, L.; Li, W.; Gan, W.; Chen, K. Selective dispersion of silver nanowires in epoxy/polyetherimide binary composites with enhanced electrical conductivity: a study of curing kinetics and morphology. *Polymer Composites* **2019**, 40, 4390-4401.
- Ghosh, S.K.; Das, T.K.; Ghosh, S.; Remanan, S.; Nath, K.; Das, P.; Das, N.C. Selective distribution of conductive carbonaceous inclusion in thermoplastic elastomer: A wet chemical approach of promoting dual percolation and inhibiting radiation pollution in

- X-band. *Composites Science and Technology* **2021**, *210*, 108800.
9. Liang, J.; Wang, Y.; Huang, Y.; Ma, Y.; Liu, Z.; Cai, J.; Zhang, C.; Gao, H.; Chen, Y. Electromagnetic interference shielding of graphene/epoxy composites. *Carbon* **2009**, *47*, 922-925.
  10. Li, J.; Zhang, G.; Ma, Z.; Fan, X.; Fan, X.; Qin, J.; Shi, X. Morphologies and electromagnetic interference shielding performances of microcellular epoxy/multi-wall carbon nanotube nanocomposite foams. *Composites Science and Technology* **2016**, *129*, 70-78.
  11. Liu, Y.; Lu, M.; Wu, K.; Yao, S.; Du, X.; Chen, G.; Zhang, Q.; Liang, L.; Lu, M. Anisotropic thermal conductivity and electromagnetic interference shielding of epoxy nanocomposites based on magnetic driving reduced graphene oxide@ Fe<sub>3</sub>O<sub>4</sub>. *Composites Science and Technology* **2019**, *174*, 1-10.
  12. Ling, J.; Zhai, W.; Feng, W.; Shen, B.; Zhang, J.; Zheng, W.G. Facile preparation of lightweight microcellular polyetherimide/graphene composite foams for electromagnetic interference shielding. *ACS applied materials & interfaces* **2013**, *5*, 2677-2684.
  13. Zhang, H.; Zhang, G.; Li, J.; Fan, X.; Jing, Z.; Li, J.; Shi, X. Lightweight, multifunctional microcellular PMMA/Fe<sub>3</sub>O<sub>4</sub>@ MWCNTs nanocomposite foams with efficient electromagnetic interference shielding. *Composites Part A: Applied Science and Manufacturing* **2017**, *100*, 128-138.
  14. Shen, B.; Zhai, W.; Tao, M.; Ling, J.; Zheng, W. Lightweight, multifunctional polyetherimide/graphene@ Fe<sub>3</sub>O<sub>4</sub> composite foams for shielding of electromagnetic pollution. *ACS applied materials & interfaces* **2013**, *5*, 11383-11391.
  15. Liang, C.; Qiu, H.; Han, Y.; Gu, H.; Song, P.; Wang, L.; Kong, J.; Cao, D.; Gu, J. Superior electromagnetic interference shielding 3D graphene nanoplatelets/reduced graphene oxide foam/epoxy nanocomposites with high thermal conductivity. *Journal of Materials Chemistry C* **2019**, *7*, 2725-2733.
  16. Chen, Y.; Zhang, H.-B.; Huang, Y.; Jiang, Y.; Zheng, W.-G.; Yu, Z.-Z. Magnetic and electrically conductive epoxy/graphene/carbonyl iron nanocomposites for efficient electromagnetic interference shielding. *Composites Science and Technology* **2015**, *118*, 178-185.
